# Supplementary material for: Intestinal immunomodulating activity and structural characterization of a new polysaccharide from stems of Dendrobium officinale
Source: Royal Society of Chemistry journal article supplement (doi:10.1039/c6fo00172f), 2016-01-01

## Supporting information

### S.1

#### Sequential extraction and fractionalization procedure of *Dendrobium officinale* stems

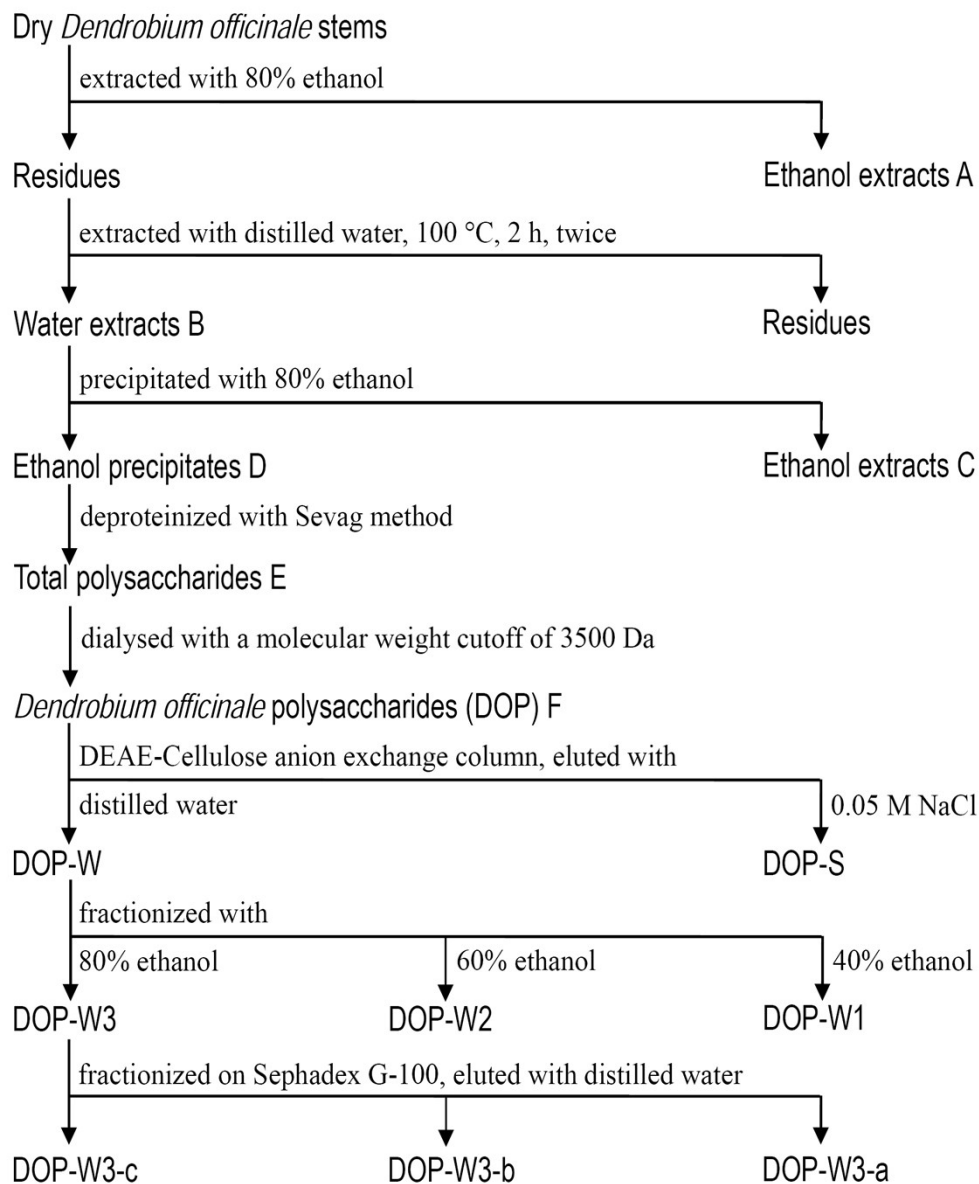

S.2

Elution chromatogram of DOP on DEAE-cellulose anion exchange column

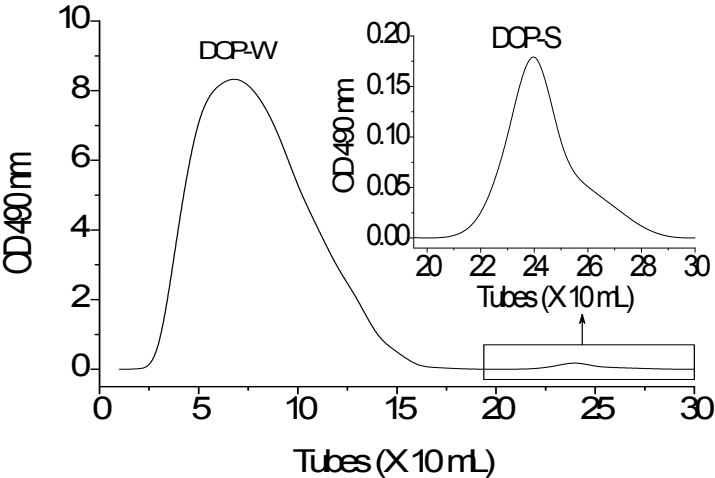

### S.3

Effects of oral administration period and doses of DOP-W3-b on body weight gains (A), spleen index (B), thymus index (C) and liver index (D) in mice. In A, means with different lowercases are significantly different ( $p < 0.05$ ). In B-D, \* and \*\* indicate significant differences at the level of  $p < 0.05$  and  $p < 0.01$  as compared with control, respectively. Body weight gain (%) = [(body weight of day 3 or 7 – body weight of day 0) / body weight of day 0] × 100. Index (mg/g) = (organ weight) / (body weight).

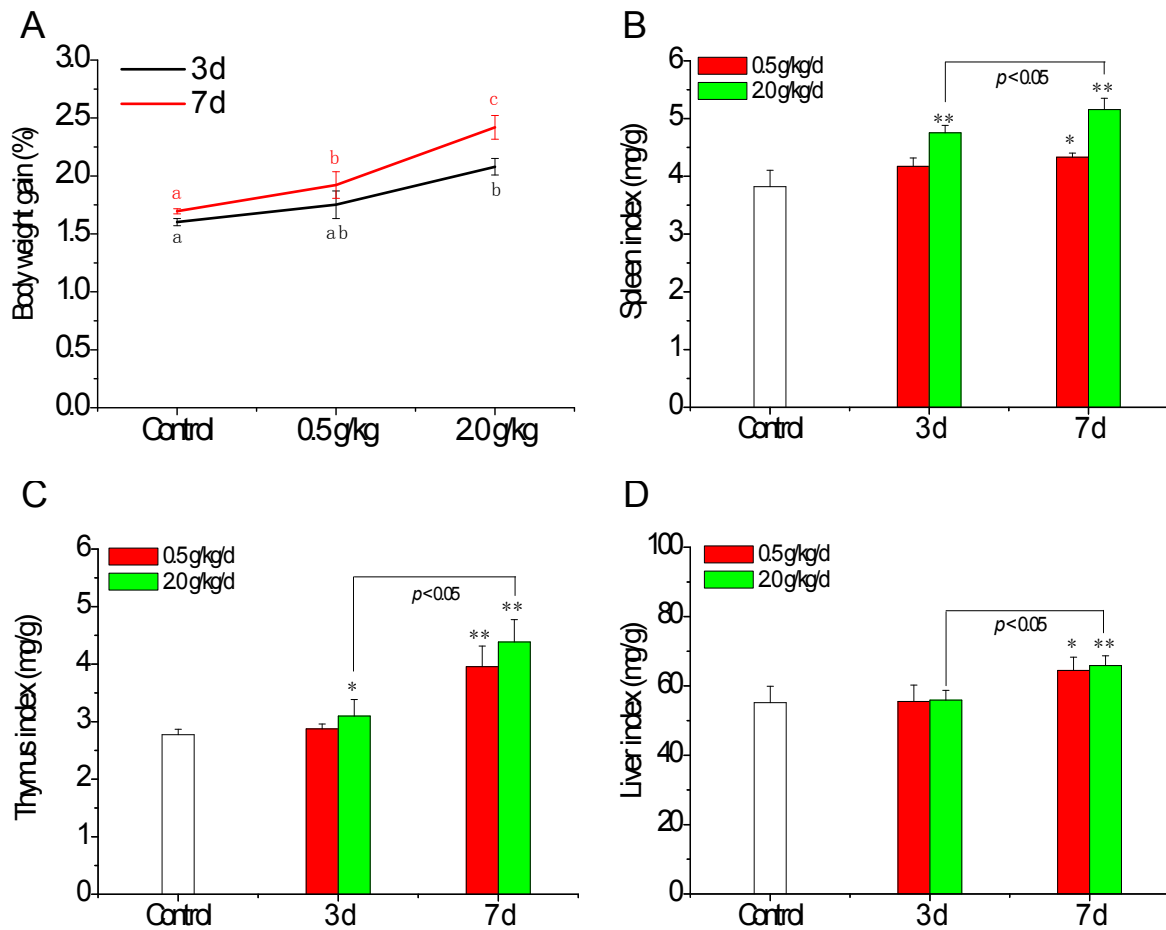

#### S.4

Number of goblet cells in the ileum of untreated mice and mice orally administrated with 2.0 g/kg DOP-W3-b. \* and \*\* indicate significant differences at the level of  $p < 0.05$  and  $p < 0.01$  as compared with control, respectively.

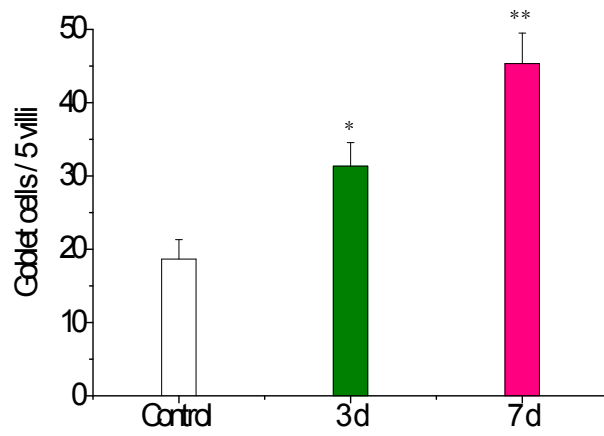

## S.5

Methylation analysis of DOP-W3-b.

**A.** TIC profile of methylated alditol acetylates; **B.** Mass fragment of 12.739 min (2,3,4,6-Me<sub>4</sub>-GlcP); **C.** Mass fragment of 15.242 min (2,3,6-Me<sub>3</sub>-Manp); **D.** Mass fragment of 16.576 min (2,3,6-Me<sub>3</sub>-GlcP); **E.** Mass fragment of 19.173 min (2,4-Me<sub>2</sub>-Manp); **F.** Mass fragment of 23.979 min (3,6-Me<sub>2</sub>-Manp)

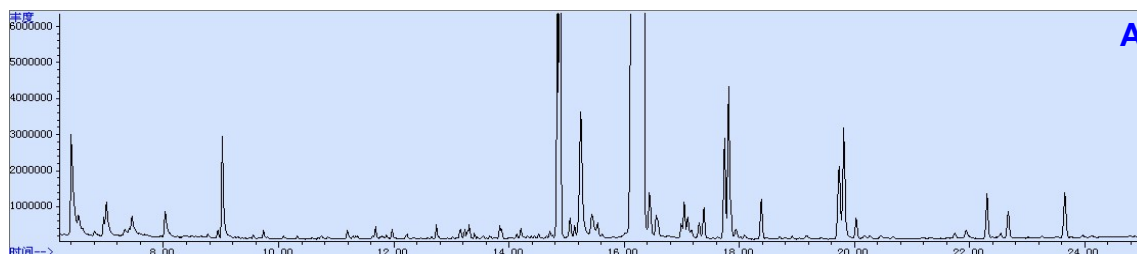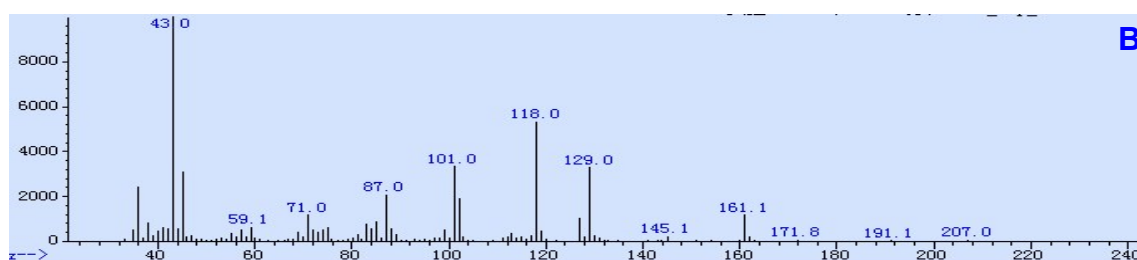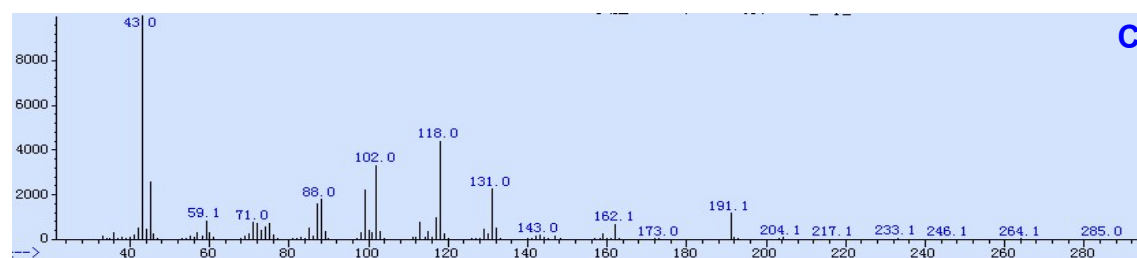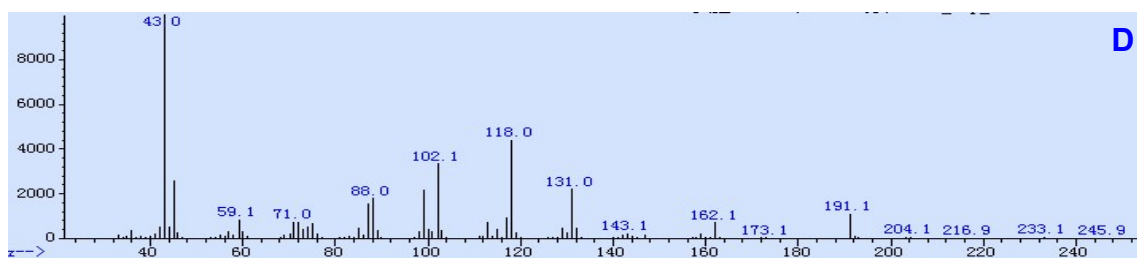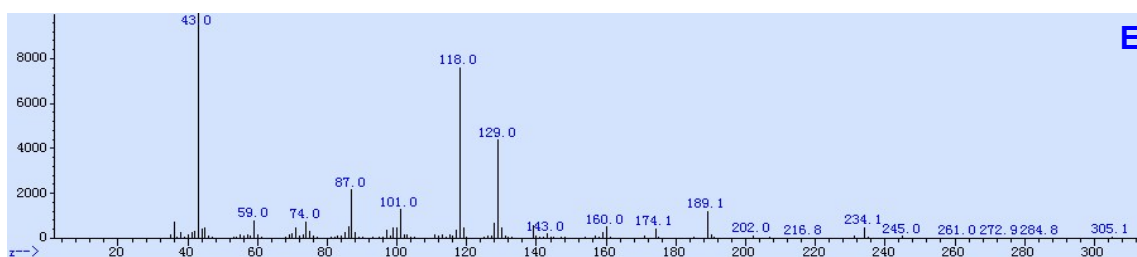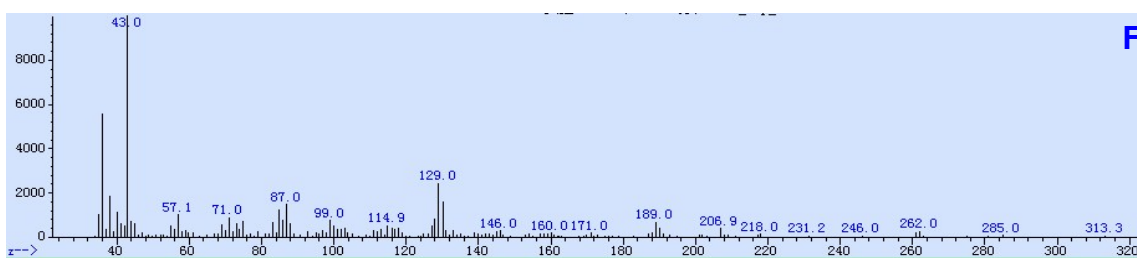

Supplement: c6fo00172f1.pdf [file c6fo00172f1.pdf]
